# Supplementary material for: Non-extractable Residues (Ner) in Persistence Assessment – Effect on the Degradation Half-life of Chemicals
Source: Research Square preprint supplement (doi:10.21203/rs.3.rs-5056873/v1), 2024-11-05
Supplement: Supplementary file 1 [file 71a73adbb42ba8c30219cb47.pdf]

# Supporting Information

## NON-EXTRACTABLE RESIDUES (NER) IN PERSISTENCE ASSESSMENT – EFFECT ON THE DEGRADATION HALF-LIFE OF CHEMICALS

Cindy Jespersen Stefan Trapp and Matthias Kästner

### Table of Contents

Details on the fit procedure

SI Table 1. Goodness-of-fit statistics and calibrated half-lives with SFO and DFOP

### Details on the fit procedure

**Recovery:** OECD 307, 308 and 309 says that recovery should be 90-110%. Not accepted in our study if minimum recovery is <70% or the recovery vary more than 30 % (pyriproxyfen OECD 308 excluded).

**Time zero values:** Adding NER and metabolite measured to parent and setting NER/metabolite value to 0 for parent scenario (all scenarios for metabolite). When the first measurement occurred later than day 0 (at day 1 or 7), a day 0 point was added as the average recovery for the test as parent. NER, metabolite and CO<sub>2</sub> was set to 0. This was done as M0 for parent should be around 100% when just added, however, in some studies the recoveries in the study never reached 100 % (e.g. 93 % in average) and therefore just choosing 100 % when the method had a lower recovery, would make the added M0 artificially high. This was done for bromoxynil in Possberg et al. (2016) which had the first measured point at day 7 and for C-DA+, C-DP, C-DS- and deltamethrin, which all had first measured point at day 1. The resulting changes were small for all cases where the first measurement was at day 1. For Possberg however, the change was significant, as the assumed starting value varied greatly otherwise. As an example in scenario i in Possberg, predicted value with an SFO fit was around 14, and for scenario ii with DFOP M0 was predicted to be around 1400. Therefore, we would have to fix a starting value anyway to be able to use the data from Possberg. In scenario iv for bromoxynil (UBA) NER I was not measured with silylation until day 7 and for isoproturon (UBA) first measurement of NER I for

both silylation and EDTA was at day 7. Therefore a point 0 was added, assuming no NER I formed on day 0. This resulted in small changes compared to not adding a point at time 0.

For 5 compounds (2,4-D, bromoxynil, C-DA+, fenoxycarb and triclosan, there were scenarios where the predicted and measured M0 were far apart (<20%) in the SFO fit and it was investigated if the fit could be improved by fixing M0. In all cases, the predicted value was lower than the measured value, and these curves typically stagnated. For all cases we found that the DegT50 value found without fixing M0 were more representative than when fixing the value, and therefore we chose not to fix any starting values.

**Metabolite fit:** Metabolites for glyphosate, thiamethoxam and triclosan. The amount of metabolite is the same in all scenarios, as their only difference is approach towards NER. For all substances, the metabolite kinetic was chosen to be SFO, as DFOP kinetics for the metabolite didn't lead to an improvement but added unnecessary complexity and long running times in CAKE. SFO described the metabolites sufficiently. The big change for the metabolite curve was seen in the choice of parent kinetic, and often improved when DFOP was chosen.

**Lag phase:** Metamitron might have a lag phase, but there are too few data points to see if it is. Otherwise, no lag phases in data sets.

**Outliers:** In most of the studies, there are too few datapoints to detect actual outliers. In the cases where some values looked unlikely (e.g. parent rising in the middle of experiment to a value higher than measured at time 0), these were due to studies with poor recovery or a high variation in recovery.

**<LOD / LOQ:** no LOD or LOQ stated in any of the studies, so we could not add a point where we take half of LOD or LOQ. We tried adding a point 0 in the end as first point with measurements < LOD or LOQ but that changed the DegT50 quite a bit, so decided to just leave these points out

**308 and 309 tests:** Made DegT50 values for entire system, not divided into environmental matrix

**MTB bioNER > total NER:** When calculated MTBbioNER is higher than measured total NER, MTBbioNER is set to be equal to total NER, so we don't make illogical calculations for scenario iii.

**SI Table 1.** Goodness-of-fit statistics and calibrated half-lives with single first-order (SFO) and Double-First-Order in Parallel (DFOP) kinetics. t-test is passed P for P < 0.05, else not passed NP.

| Substance     | Scen. | Visual                                |                                                | X <sup>2</sup> |      | t-test |          | DegT50 |                |                   |
|---------------|-------|---------------------------------------|------------------------------------------------|----------------|------|--------|----------|--------|----------------|-------------------|
|               |       | SFO                                   | DFOP                                           | SFO            | DFOP | SFO    | DFOP     | SFO    | DFOP (overall) | DFOP (slow phase) |
| 2,4-D         | i     | Good                                  | Good, but not actually biphasic, so SFO better | 22.8           | 27.2 | NP     | P<br>NP  | 2.81   | 2.81           | >10000            |
|               | ii    | Not acceptable – definitely biphasic! | Good                                           | 28.5           | 15.9 | NP     | NP<br>NP | 42.7   | 5.28           | >10000            |
|               | iii   | Not acceptable – definitely biphasic! | Good                                           | 29.6           | 18.4 | P      | NP<br>NP | 5.88   | 4.06           | >10000            |
| Acetaminophen | A i   | Miss all after point 3                | Good                                           | 20.5           | 4.05 | NP     | P<br>NP  | 0.484  | 0.451          | 1560              |
|               | A ii  | Fine – equally good                   | Fine – equally good                            | 2.77           | 2.47 | P      | NP<br>P  | 792    | 945            | 1050              |
|               | A iii | Fine – equally good                   | Fine – equally good                            | 3.22           | 2.5  | P      | NP<br>P  | 490    | 542            | 630               |
|               | B i   | Not acceptable – definitely biphasic! | Good                                           | 44.3           | 13.1 | P      | P<br>NP  | 1.58   | 1.17           | 160               |
|               | B ii  | Fine – equally good                   | Fine – equally good                            | 1.76           | 1.93 | P      | N/A<br>P | 714    | 714            | 715               |
|               | B iii | Fine – equally good                   | Fine – equally good                            | 1.8            | 1.79 | P      | NP<br>P  | 539    | 549            | 578               |
|               | C i   | Miss all after point 3                | Good                                           | 25.8           | 1.76 | P      | P<br>P   | 0.498  | 0.438          | 221               |
|               | C ii  | Fine – equally good                   | Fine – equally good                            | 2.31           | 1.59 | P      | NP<br>P  | 616    | 714            | 806               |
|               | C iii | Fine – equally good                   | Fine – equally good                            | 2.84           | 1.73 | P      | NP<br>P  | 439    | 478            | 559               |

| Substance           | Scen.   | Visual - SFO              | Visual DFOP | X <sup>2</sup> SFO | X <sup>2</sup> DFOP | t-test | t-test   | DegT50 SFO | DFOP overall | DFOP slow |
|---------------------|---------|---------------------------|-------------|--------------------|---------------------|--------|----------|------------|--------------|-----------|
| Atrazine            | i       | Good                      | Good        | 1.57               | 0.89                | P      | NP<br>NP | 211        | >10000       | >10000    |
|                     | ii      | Good                      | Good        | 1.2                | 1.5                 | NP     | NP<br>NP | >10000     | >10000       | >10000    |
|                     | iii     | Good                      | Good        | 1.07               | 1.35                | NP     | NP<br>NP | >10000     | >10000       | >10000    |
| Benzovindiflupyr    | i       | Biphasic, so DFOP better  | Good        | 6.41               | 4.14                | NP     | NP<br>NP | 322        | 774          | 1140      |
|                     | ii      | Biphasic                  | Good        | 6.09               | 4.35                | NP     | NP<br>NP | 649        | >10000       | >10000    |
|                     | iii     | Biphasic                  | Good        | 6.1                | 4.31                | NP     | NP<br>NP | 621        | >10000       | >10000    |
| Bromoxynil UBA      | i       | OK                        | Good        | 7.72               | 3.38                | P      | P<br>P   | 8.09       | 6.57         | 10.1      |
|                     | ii      | Poor - biphasic           | Good        | 6.7                | 1.36                | P      | P<br>P   | 154        | 260          | 415       |
|                     | iii     | Poor - biphasic           | Good        | 6.85               | 1.25                | P      | P<br>P   | 130        | 187          | 301       |
|                     | iv sily | OK                        | Good        | 10.9               | 0.673               | P      | P<br>NP  | 13         | 10.6         | 167       |
|                     | iv EDTA | Not great                 | Good        | 13.5               | 1.66                | P      | P<br>NP  | 14.5       | 10.6         | 143       |
| Bromoxynil Possberg | i       | OK                        | Good        | 11.4               | 1.39                | P      | P<br>NP  | 2.56       | 2.12         | 113       |
|                     | ii      | Not great, not terrible   | Good        | 4.52               | 2.01                | NP     | NP<br>NP | 216        | 1210         | 1670      |
|                     | iii     | Not great, not terrible   | Good        | 5.14               | 2.05                | NP     | NP<br>NP | 180        | 770          | 1120      |
| C-DA+               | 308 i   | Not acceptable - biphasic | Good        | 14                 | 2.3                 | P      | P<br>P   | 108        | 74.8         | 230       |
|                     | 308 ii  | Good                      | Good        | 2.43               | 2.72                | P      | NP<br>NP | 457        | 503          | 525       |

| Substance | Scen.   | Visual - SFO | Visual DFOP                        | X <sup>2</sup> SFO | X <sup>2</sup> DFOP | t-test | t-test   | DegT50 SFO | DFOP overall | DFOP slow |
|-----------|---------|--------------|------------------------------------|--------------------|---------------------|--------|----------|------------|--------------|-----------|
| C-DA+     | 308 iii | Good         | Good                               | 2.52               | 2.71                | P      | NP<br>P  | 355        | 386          | 410       |
|           | 309 i   | Not good     | OK                                 | 9.04               | 2.84                | NP     | NP<br>NP | 375        | >10000       | >10000    |
|           | 309 ii  | OK           | OK                                 | 1.48               | 0.613               | P      | NP<br>NP | 524        | >10000       | >10000    |
|           | 309 iii | OK           | OK                                 | 2.02               | 0.433               | P      | NP<br>NP | 306        | >10000       | >10000    |
| C-DP      | 308 i   | Good         | Good                               | 11.1               | 12.3                | P      | NP<br>NP | 10.4       | 9.93         | 118       |
|           | 308 ii  | Okay         | Okay (last point better described) | 9.56               | 8.36                | P      | NP<br>NP | 27.6       | 23           | 222       |
|           | 308 iii | Good         | Good                               | 10.7               | 12.4                | P      | NP<br>NP | 12.1       | 11.8         | >10000    |
|           | 309 i   | Good         | Good                               | 6.98               | 7.38                | P      | NP<br>NP | 17.6       | 16           | >10000    |
|           | 309 ii  | Good         | Good                               | 5.85               | 4.78                | P      | NP<br>NP | 36.6       | 31.9         | >10000    |
|           | 309 iii | Good         | Good                               | 6.57               | 6.9                 | P      | NP<br>NP | 17.5       | 16.1         | >10000    |
| C-DS-     | 308 i   | Good         | Good                               | 9                  | 10.7                | P      | NP<br>NP | 12.9       | 12.8         | >10000    |
|           | 308 ii  | Good         | Good                               | 7.3                | 6.61                | P      | NP<br>NP | 36.4       | 31.7         | >10000    |
|           | 308 iii | Good         | Good                               | 8.55               | 10.2                | P      | P<br>P   | 17.9       | 17.9         | 17.9      |
|           | 309 i   | Good         | Good                               | 6.94               | 5.95                | P      | NP<br>NP | 21.4       | 18.4         | >10000    |
|           | 309 ii  | Good         | Good                               | 5.15               | 5.22                | P      | NP<br>NP | 30.8       | 27.9         | >10000    |
|           | 309 iii | Good         | Good                               | 7.38               | 6.56                | P      | NP<br>NP | 21.1       | 18           | >10000    |

| Substance     | Scen.      | Visual - SFO   | Visual DFOP | X <sup>2</sup> SFO | X <sup>2</sup> DFOP | t-test | t-test   | DegT50 SFO | DFOP overall | DFOP slow |
|---------------|------------|----------------|-------------|--------------------|---------------------|--------|----------|------------|--------------|-----------|
| Celecoxib     | 308 We i   | OK             | OK          | 3.94               | 4.54                | NP     | NP<br>NP | 1870       | 1870         | 1880      |
|               | 308 We ii  | OK             | OK          | 4.27               | 4.92                | NP     | NP<br>NP | >10000     | >10000       | >10000    |
|               | 308 We iii | OK             | OK          | 4.34               | 5                   | NP     | NP<br>NP | >10000     | >10000       | >10000    |
|               | 308 Wi i   | OK             | OK          | 6.11               | 7.04                | NP     | NP<br>NP | 5850       | 5850         | 5870      |
|               | 308 Wi ii  | OK             | OK          | 7.13               | 8.22                | NP     | NP<br>NP | >10000     | >10000       | >10000    |
|               | 308 Wi iii | OK             | OK          | 7.15               | 8.24                | NP     | NP<br>NP | >10000     | >10000       | >10000    |
|               | 309 We i   | Fair           | Good        | 8.51               | 4.17                | P      | NP<br>NP | 59.4       | >10000       | >10000    |
|               | 309 We ii  | Good           | Good        | 2.79               | 2.71                | NP     | NP<br>NP | 641        | >10000       | >10000    |
|               | 309 We iii | Good           | Good        | 2.84               | 2.72                | NP     | NP<br>NP | 600        | >10000       | >10000    |
|               | 309 Wi i   | Fair           | Good        | 5.18               | 2.13                | P      | NP<br>P  | 125        | 148          | 204       |
|               | 309 Wi ii  | Good           | Good        | 2.28               | 0.944               | P      | NP<br>NP | 503        | >10000       | >10000    |
|               | 309 Wi iii | Good           | Good        | 2.33               | 0.958               | P      | NP<br>NP | 478        | >10000       | >10000    |
| Ciprofloxacin | i          | Not acceptable | Good        | 21.6               | 0.0452              | P      | P<br>P   | 11.4       | 6.6          | 111       |
|               | ii         | Good           | Good        | 2.16               | 3.08                | NP     | NP<br>NP | >10000     | >10000       | >10000    |
|               | iii        | Good           | Good        | 1.99               | 2.84                | NP     | NP<br>NP | >10000     | >10000       | >10000    |

| Substance   | Scen.   | Visual - SFO                                                | Visual DFOP | X <sup>2</sup> SFO | X <sup>2</sup> DFOP | t-test | t-test   | DegT50 SFO | DFOP overall | DFOP slow |
|-------------|---------|-------------------------------------------------------------|-------------|--------------------|---------------------|--------|----------|------------|--------------|-----------|
| Deltamethin | CLS i   | Good                                                        | Good        | 2.1                | 2.42                | P      | NP<br>NP | 137        | 159          | >10000    |
|             | CLS ii  | Good                                                        | Good        | 1.83               | 2.17                | P      | NP<br>NP | 222        | 257          | >10000    |
|             | CLS iii | Good                                                        | Good        | 1.99               | 2.32                | P      | NP<br>P  | 178        | 234          | >10000    |
|             | SC i    | Good                                                        | Good        | 3.54               | 4.21                | P      | NP<br>NP | 144        | 144          | 144       |
|             | SC ii   | Good                                                        | Good        | 2.97               | 3.54                | P      | NP<br>NP | 266        | 323          | >10000    |
|             | SC iii  | Good                                                        | Good        | 3.08               | 3.67                | P      | NP<br>NP | 221        | 221          | 221       |
| Dicamba     | i       | Good                                                        | Good        | 7.99               | 8.71                | P      | P<br>NP  | 9.42       | 9.18         | >10000    |
|             | ii      | Good                                                        | Good        | 3.94               | 4.07                | P      | NP<br>NP | 189        | >10000       | >10000    |
|             | iii     | Good                                                        | Good        | 4.75               | 4.59                | P      | NP<br>NP | 137        | >10000       | >10000    |
| Fenoxycarb  | 2.2 i   | Only describes first 2 points, but the rest is only a few % | Good        | 11.8               | 1.5                 | P      | NP<br>NP | 2.7        | 1.07         | 136       |
|             | 2.2 ii  | Bad – not acceptable                                        | Good        | 17.9               | 2.26                | P      | NP<br>NP | 95.4       | 72.9         | 1420      |
|             | 2.2 iii | Bad – not acceptable                                        | Good        | 28.3               | 5.23                | NP     | NP<br>NP | 35.4       | 7.54         | 436       |
|             | 2.2 iv  | Not good                                                    | Good        | 19.1               | 2.23                | P      | NP<br>NP | 3.28       | 0.408        | 181       |
|             | 2.3 i   | OK - only describes first 2 points, but the rest is < 5 %   | Good        | 11.6               | 0.679               | P      | P<br>NP  | 3.07       | 2.52         | >10000    |
|             | 2.3 ii  | Bad – not acceptable                                        | Good        | 11.2               | 1.42                | P      | NP<br>NP | 112        | 665          | 3350      |

| Substance       | Scen.   | Visual - SFO                                                                                               | Visual DFOP                 | X <sup>2</sup> SFO | X <sup>2</sup> DFOP | t-test  | t-test         | DegT50 SFO     | DFOP overall   | DFOP slow     |
|-----------------|---------|------------------------------------------------------------------------------------------------------------|-----------------------------|--------------------|---------------------|---------|----------------|----------------|----------------|---------------|
| Fenoxycarb      | 2.3 iii | Bad – not acceptable                                                                                       | Good                        | 16.9               | 2.32                | P       | NP<br>NP       | 52.3           | 20             | 1530          |
|                 | 2.3 iv  | Not good                                                                                                   | Good                        | 23.1               | 2.92                | P       | NP<br>NP       | 4.36           | 3.23           | >10000        |
|                 | 2.4 i   | Only describes first 2 points, but the rest is only a few %                                                | Good                        | 12.6               | 0.971               | P       | NP<br>NP       | 2.8            | 0.374          | 105           |
|                 | 2.4 ii  | Bad – not acceptable                                                                                       | Good                        | 12.4               | 0.0811              | NP      | P<br>P         | 135            | 244            | 696           |
|                 | 2.4 iii | Bad – not acceptable                                                                                       | Good                        | 19.8               | 0.271               | NP      | P<br>P         | 65.1           | 14.3           | 319           |
|                 | 2.4 iv  | Not good                                                                                                   | Good                        | 18.2               | 2.21                | P       | NP<br>NP       | 3.69           | 2.25           | 116           |
| Glyphosate AMPA | i       | OK – difficult case with the metabolite as CAKE can't describe cases with "lag phase" for metabolites well | OK, same issues as with SFO | 10<br>16.6         | 8.84<br>17.1        | P<br>NP | NP<br>P<br>NP  | 14.3<br>>10000 | 12.5<br>>10000 | 16.4<br>N/A   |
|                 | ii      | Good                                                                                                       | Good                        | 5.7<br>9           | 7.11<br>10.1        | P<br>NP | NP<br>NP<br>P  | 37.2<br>>10000 | 36.9<br>>10000 | >10000<br>N/A |
|                 | iii     | OK                                                                                                         | OK                          | 10.4<br>15.2       | 13.1<br>17.1        | P<br>NP | NP<br>NP<br>NP | 23.2<br>>10000 | 23.1<br>>10000 | >10000<br>N/A |
| Ibuprofen       | i       | Good                                                                                                       | Good                        | 4.7                | 5.59                | P       | P<br>N/A       | 10.8           | 10.8           | 43.9          |
|                 | ii      | Acceptable, although it looks like it could be biphasic                                                    | Good                        | 8.68               | 3.48                | P       | NP<br>NP       | 46             | 30.7           | >10000        |
|                 | iii     | Good                                                                                                       | Good                        | 4.77               | 5.22                | P       | NP<br>NP       | 20.3           | 19.5           | >10000        |

| Substance                               | Scen.   | Visual - SFO                                          | Visual DFOP                | X <sup>2</sup> SFO | X <sup>2</sup> DFOP | t-test | t-test    | DegT50 SFO | DFOP overall | DFOP slow |
|-----------------------------------------|---------|-------------------------------------------------------|----------------------------|--------------------|---------------------|--------|-----------|------------|--------------|-----------|
| Isoproturon UBA                         | i       | Good                                                  | Good                       | 3.42               | 3.69                | P      | NP<br>NP  | 53.6       | 52.7         | 57.3      |
|                                         | ii      | OK, but might be biphasic                             | Good                       | 3.55               | 2.68                | P      | NP<br>P   | 263        | 362          | 478       |
|                                         | iii     | Good                                                  | Good                       | 3.46               | 3                   | P      | NP<br>P   | 168        | 181          | 230       |
|                                         | iv sily | Good                                                  | Good                       | 3.74               | 2.9                 | P      | NP<br>P   | 68.4       | 63.4         | 94.7      |
|                                         | iv EDTA | Good                                                  | Good                       | 3.16               | 2.47                | P      | NP<br>P   | 67.3       | 63.2         | 88.3      |
| Isoproturon Mordaunt                    | i       | OK                                                    | Better                     | 9.9                | 8.1                 | P      | NP<br>NP  | 21.7       | 18.8         | >10000    |
|                                         | ii      | OK                                                    | Good                       | 4.14               | 3.57                | P      | NP<br>NP  | 186        | >10000       | >10000    |
|                                         | iii     | OK                                                    | Good                       | 6.09               | 5.39                | P      | NP<br>NP  | 105        | >10000       | >10000    |
| Lindane                                 | i       | Good                                                  | Good                       | 1.79               | 0.638               | P      | NP<br>NP  | 238        | >10000       | >10000    |
|                                         | ii      | Good                                                  | Good                       | 1.28               | 0.339               | P      | NP<br>P   | 401        | 588          | 654       |
|                                         | iii     | Good                                                  | Good                       | 1.18               | 0.358               | P      | NP<br>P   | 332        | 410          | 447       |
| Metamitron                              | i       | OK                                                    | OK (but not biphasic, g=1) | 23.3               | 33.3                | P      | NP<br>N/A | 4.09       | 4.09         | 35.7      |
|                                         | ii      | OK                                                    | OK                         | 12                 | 12.8                | P      | NP<br>NP  | 13         | 10.4         | >10000    |
|                                         | iii     | OK                                                    | OK                         | 14                 | 19.8                | P      | NP<br>NP  | 7.6        | 7.46         | >10000    |
| Pyriproxyfen (parent + metabolite pool) | We i    | OK – what is wrong is not the curve, more the scatter | OK – but scatter           | 8.42               | 9.41                | P      | NP<br>NP  | 124        | 136          | 156       |

| Substance                               | Scen.   | Visual - SFO                                                                 | Visual DFOP                                                       | X <sup>2</sup> SFO | X <sup>2</sup> DFOP | t-test  | t-test         | DegT50 SFO     | DFOP overall   | DFOP slow     |
|-----------------------------------------|---------|------------------------------------------------------------------------------|-------------------------------------------------------------------|--------------------|---------------------|---------|----------------|----------------|----------------|---------------|
| Pyriproxyfen (parent + metabolite pool) | We ii   | OK                                                                           | OK                                                                | 6.14               | 7.07                | NP      | NP<br>NP       | 1930           | 3020           | 3070          |
|                                         | We iii  | OK                                                                           | OK                                                                | 6.13               | 7.05                | NP      | NP<br>NP       | 607            | 709            | 725           |
|                                         | Wi i    | OK – recovery is not good. Average is around 80%. Making the data unreliable | OK – recovery is not good, around 80%, making the data unreliable | 6.8                | 6.57                | P       | NP<br>NP       | 92.5           | 242            | 459           |
|                                         | Wi ii   | OK                                                                           | OK                                                                | 5.52               | 6.03                | P       | NP<br>NP       | 227            | >10000         | >10000        |
|                                         | Wi iii  | OK                                                                           | OK                                                                | 5.43               | 6.07                | P       | NP<br>NP       | 173            | >10000         | >10000        |
| Sulfadiazine                            | i       | OK, but M0 and the last datapoints are not well described                    | Good                                                              | 9.34               | 4.12                | P       | P<br>P         | 10.1           | 6.99           | 22.1          |
|                                         | ii      | OK                                                                           | OK                                                                | 2.7                | 3.03                | NP      | NP<br>NP       | >10000         | >10000         | >10000        |
|                                         | iii     | OK                                                                           | OK                                                                | 2.7                | 3.03                | NP      | NP<br>NP       | >10000         | >10000         | >10000        |
|                                         | iv EDTA | Not great                                                                    | Good                                                              | 10.6               | 0.154               | P       | P<br>P         | 37.4           | 25.3           | 151           |
| Thiamethoxam (Clothianidine)            | GAR i   | Good                                                                         | Good                                                              | 4.56<br>5.72       | 5.15<br>6.13        | P<br>NP | P<br>P<br>NP   | 33.5<br>>10000 | 33.5<br>>10000 | 33.5<br>N/A   |
|                                         | GAR ii  | Good                                                                         | Good                                                              | 2.6<br>3.44        | 2.78<br>3.5         | P<br>NP | NP<br>NP<br>NP | 51.9<br>404    | 50.1<br>990    | >10000<br>N/A |
|                                         | GAR iii | Good                                                                         | Good                                                              | 4.69<br>5.9        | 5.27<br>6.31        | P<br>NP | P<br>nd<br>NP  | 33.5<br>>10000 | 33.3<br>>10000 | 33.5<br>N/A   |
|                                         | 18A i   | Looks (slightly) biphasic, but acceptable                                    | Good                                                              | 4.74<br>6.41       | 2.42<br>3.28        | P<br>NP | P<br>P<br>NP   | 140<br>74.7    | 177<br>>10000  | 283<br>N/A    |

| Substance                       | Scen.      | Visual - SFO                                    | Visual DFOP | X <sup>2</sup><br>SFO | X <sup>2</sup><br>DFOP | t-<br>test | t-test         | DegT50<br>SFO  | DFOP<br>overall  | DFOP<br>slow  |
|---------------------------------|------------|-------------------------------------------------|-------------|-----------------------|------------------------|------------|----------------|----------------|------------------|---------------|
| Thiamethoxam<br>(Clothianidine) | 18A ii     | Looks (slightly)<br>biphasic, but<br>acceptable | Good        | 5.93<br>8.02          | 2.7<br>3.7             | P<br>NP    | P<br>NP<br>NP  | 173<br>65.6    | >10000<br>>10000 | >10000<br>N/A |
|                                 | 18A<br>iii | Looks (slightly)<br>biphasic, but<br>acceptable | Good        | 6.1<br>8.24           | 2.44<br>3.37           | P<br>NP    | P<br>NP<br>NP  | 142<br>74.2    | >10000<br>>10000 | >10000<br>N/A |
|                                 | EAS i      | OK                                              | Good        | 3.65<br>5.02          | 2.69<br>3.92           | P<br>P     | NP<br>P<br>NP  | 61<br>198      | 56.7<br>>10000   | 73.7<br>N/A   |
|                                 | EAS<br>ii  | OK                                              | Good        | 3.25<br>4.54          | 2.79<br>3.93           | P<br>P     | NP<br>NP<br>NP | 63.3<br>183    | 57.9<br>1290     | 226<br>N/A    |
|                                 | EAS<br>iii | OK                                              | Good        | 3.49<br>4.82          | 2.56<br>3.72           | P<br>NP    | P<br>NP<br>NP  | 57.7<br>225    | 51.2<br>>10000   | >10000<br>N/A |
|                                 | SAR i      | Looks (slightly)<br>biphasic, but<br>acceptable | Good        | 5.93<br>7.63          | 3.28<br>4.36           | P<br>P     | P<br>NP<br>NP  | 89<br>50.3     | 82<br>679        | 438<br>N/A    |
|                                 | SAR<br>ii  | Looks (slightly)<br>biphasic, but<br>acceptable | Good        | 4.76<br>6.2           | 3.75<br>4.87           | P<br>P     | NP<br>NP<br>NP | 97.5<br>47.1   | 99.4<br>183      | 200<br>N/A    |
|                                 | SAR<br>iii | Looks (slightly)<br>biphasic, but<br>acceptable | Good        | 5.77<br>7.44          | 3.48<br>4.56           | P<br>P     | P<br>NP<br>NP  | 88.8<br>50.4   | 82.1<br>473      | 527<br>N/A    |
| Triclosan<br>(Methyl-triclosan) | 2.2 i      | Okay                                            | Good        | 8.12<br>10.9          | 0.525<br>4.66          | P<br>NP    | P<br>P<br>NP   | 54.1<br>>10000 | 43.7<br>>10000   | 71.5<br>N/A   |
|                                 | 2.2. ii    | Good                                            | Good        | 2.42<br>3.85          | 1.21<br>2.51           | P<br>NP    | NP<br>P<br>NP  | 152<br>161     | 158<br>>10000    | 180<br>N/A    |
|                                 | 2.2 iii    | Good                                            | Good        | 2.51<br>3.97          | 1.23<br>2.54           | P<br>NP    | NP<br>P<br>NP  | 139<br>178     | 144<br>>10000    | 166<br>N/A    |

| Substance                       | Scen.   | Visual - SFO                                                     | Visual DFOP | X <sup>2</sup><br>SFO | X <sup>2</sup><br>DFOP | t-<br>test | t-test         | DegT50<br>SFO  | DFOP<br>overall | DFOP<br>slow  |
|---------------------------------|---------|------------------------------------------------------------------|-------------|-----------------------|------------------------|------------|----------------|----------------|-----------------|---------------|
| Triclosan<br>(Methyl-triclosan) | 2.2 iv  | Good                                                             | Good        | 1.43<br>3.26          | 0.371<br>3.07          | P<br>NP    | NP<br>P<br>NP  | 70.7<br>>10000 | 69.6<br>>10000  | 85.1<br>N/A   |
|                                 | 2.3 i   | Only first two points<br>well described,<br>hereafter few % left | Good        | 11.8<br>14.2          | 2.63<br>6.99           | P<br>NP    | P<br>NP<br>NP  | 3.42<br>>10000 | 2.9<br>>10000   | 48.4<br>N/A   |
|                                 | 2.3 ii  | Okay                                                             | Good        | 7.9<br>11.1           | 3.49<br>4.03           | P<br>NP    | NP<br>NP<br>NP | 119<br>31.5    | 159<br>>10000   | 273<br>N/A    |
|                                 | 2.3 iii | Okay                                                             | Good        | 8.1<br>11.3           | 3.63<br>4.19           | P<br>NP    | NP<br>P<br>NP  | 108<br>28.6    | 120<br>1170     | 212<br>N/A    |
|                                 | 2.3 iv  | Not good                                                         | Good        | 28.3<br>34.1          | 4.4<br>6.6             | P<br>NP    | P<br>NP<br>NP  | 5.31<br>>10000 | 3.85<br>>10000  | 162<br>N/A    |
|                                 | 2.4 i   | Good                                                             | Good        | 11.7<br>9.29          | 0.255<br>9.37          | P<br>P     | P<br>P<br>P    | 4.89<br>83.2   | 4.07<br>95.6    | 55.9<br>N/A   |
|                                 | 2.4 ii  | Horrible fit                                                     | Good        | 45.1<br>39.2          | 16.7<br>12.9           | P<br>P     | P<br>NP<br>NP  | 5.93<br>70.4   | 8.52<br>84.9    | >10000<br>N/A |
|                                 | 2.4 iii | Horrible fit                                                     | Good        | 42.1<br>35.8          | 9.28<br>9.25           | P<br>P     | P<br>NP<br>NP  | 5.97<br>69.8   | 6.56<br>103     | >10000<br>N/A |
|                                 | 2.4 iv  | OK                                                               | Good        | 15.7<br>11.2          | 0.0292<br>7.29         | P<br>P     | P<br>P<br>P    | 5.75<br>72.9   | 5.21<br>82.8    | 113<br>N/A    |
| Trifluralin                     | i       | Good                                                             | Good        | 2.05                  | 1.55                   | P          | NP<br>NP       | 175            | 279             | 410           |
|                                 | ii      | Good                                                             | Good        | 1.08                  | 1.36                   | P          | NP<br>NP       | 656            | 665             | 666           |
|                                 | iii     | Good                                                             | Good        | 1.12                  | 1.4                    | P          | N/A<br>P       | 570            | 570             | 568           |

| Substance    | Scen.         | Visual - SFO | Visual DFOP | $\chi^2$<br>SFO | $\chi^2$<br>DFOP | t-<br>test | t-test    | DegT50<br>SFO | DFOP<br>overall | DFOP<br>slow |
|--------------|---------------|--------------|-------------|-----------------|------------------|------------|-----------|---------------|-----------------|--------------|
| Voriconazole | 308<br>We i   | Good         | Good        | 0.85            | 0.533            | P          | NP<br>P   | 249           | 269             | 281          |
|              | 308<br>We ii  | Good         | Good        | 1.05            | 0.841            | P          | NP<br>P   | 442           | 529             | 555          |
|              | 308<br>We iii | Good         | Good        | 1.11            | 0.883            | P          | NP<br>P   | 418           | 502             | 529          |
|              | 308<br>Wi i   | Good         | Good        | 1.79            | 1.91             | P          | NP<br>NP  | 216           | >10000          | >10000       |
|              | 308<br>Wi ii  | Good         | Good        | 1.73            | 1.99             | NP         | NP<br>P   | 977           | 977             | 976          |
|              | 308<br>Wi iii | Good         | Good        | 1.71            | 1.96             | NP         | P<br>NP   | 901           | 901             | 903          |
|              | 309<br>We i   | Good         | Good        | 2.53            | 2.49             | P          | NP<br>NP  | 203           | >10000          | >10000       |
|              | 309<br>We ii  | Good         | Good        | 2.28            | 2.62             | NP         | N/A<br>NP | >10000        | >10000          | >10000       |
|              | 309<br>We iii | Good         | Good        | 2.43            | 2.8              | NP         | NP<br>NP  | >10000        | >10000          | >10000       |
|              | 309<br>Wi i   | Good         | Good        | 2.56            | 2.95             | NP         | N/A<br>NP | >10000        | >10000          | >10000       |
|              | 309<br>Wi ii  | Good         | Good        | 3.04            | 3.5              | NP         | N/A<br>NP | >10000        | >10000          | >10000       |
|              | 309<br>Wi iii | Good         | Good        | 2.97            | 3.42             | NP         | N/A<br>NP | >10000        | >10000          | >10000       |

For substances with metabolites (glyphosate, thiamethoxam and triclosan), the  $\chi^2$  stated is for parent followed by for overall system, t-test is for parent k (for DFOP this is two values) followed by metabolite k. DegT50 is for parent first, then metabolite.

t-test: P is passed ( $P < 0.05$ ), NP is not passed, N/A is not applicable, nd is not determined. In t-test DFOP, first notation is for the fast degradation rate, the second is for slow degradation rate

A, B, C, SAR, GAR, 18A, EAS, We, Wi, 2.2, 2.3, 2.4 denote tests in different soils.

308 and 309 denote tests in sediment (OECD 308) or surface water (OECD 309). All other tests were in soil (OECD 307 or similar).
